# Supplementary material
Source: PubMed Central journal article supplement (PMC9815474)
Supplement: NIHMS1840910-supplement-Supplemental_Material.pdf [file NIHMS1840910-supplement-Supplemental_Material.pdf]

## Supplemental Materials

Table S1. Externalizing Behavior Moderated Mediation Model

| Effects for Externalizing Behavior (EB)        |       |      |       |            |
|------------------------------------------------|-------|------|-------|------------|
| Intercept Factor                               | EST   | SE   | STD   | <i>p</i> < |
| <b>Intercept Factor</b>                        |       |      |       |            |
| Mean                                           | 1.45  | 0.08 | 1.69  | .01        |
| Variance                                       | 0.66  | 0.04 | 0.89  | .01        |
| Covariance with Slope Factor                   | -0.09 | 0.04 | -0.22 | .02        |
| <b>Direct Effects</b>                          |       |      |       |            |
| Impulsiveness (IMP)                            | 0.23  | 0.05 | 0.27  | .01        |
| Sensation Seeking (SS)                         | 0.23  | 0.06 | 0.27  | .01        |
| IMP x SS                                       | 0.13  | 0.05 | 0.21  | .01        |
| Gender (Girl = 0, Boy = 1)                     | -0.06 | 0.10 | -0.04 | .53        |
| <b>Effects for Externalizing Behavior (EB)</b> |       |      |       |            |
| Slope Factor                                   | EST   | SE   | STD   | <i>p</i> < |
| <b>Slope Factor</b>                            |       |      |       |            |
| Slope Factor Mean                              | -0.16 | 0.09 | -0.32 | .06        |
| Slope Factor Variance                          | 0.25  | 0.07 | 0.96  | .01        |
| <b>Direct Effects</b>                          |       |      |       |            |
| Impulsiveness (IMP)                            | -0.08 | 0.05 | -0.16 | .09        |
| Sensation Seeking (SS)                         | -0.08 | 0.07 | -0.15 | .26        |
| IMP x SS                                       | -0.08 | 0.05 | -0.22 | .13        |
| Gender (Girl = 0, Boy = 1)                     | 0.00  | 0.08 | 0.00  | .97        |
| <b>Effects for Marijuana Use Frequency</b>     |       |      |       |            |
|                                                | EST   | SE   | STD   | <i>p</i> < |
| Impulsiveness (IMP)                            | 0.22  | 0.20 | 0.10  | .27        |
| Sensation Seeking (SS)                         | 0.31  | 0.24 | 0.14  | .19        |
| IMP x SS                                       | -0.44 | 0.25 | -0.28 | .07        |
| EB Intercept Factor                            | 0.69  | 0.20 | 0.27  | .01        |
| EB Slope Factor                                | 0.57  | 0.57 | 0.14  | .32        |
| Gender (Girl = 0, Boy = 1)                     | 0.09  | 0.35 | 0.02  | .80        |

*Note.* EST = unstandardized estimate; SE = standard error; STD =

standardized estimate. Impulsiveness was centered at one SD above the mean and sensation seeking was centered at the mean.

The indirect effect from sensation seeking to marijuana use through the EB intercept factor was significant,  $\beta = 0.02$  [0.01, 0.05]. The model had excellent overall fit (indices obtained via WLSMV estimation):  $\chi^2 = 33.31$ ,  $df = 24$ ,  $p = .10$ ; CFI = .99; RMSEA [90% CI] = .03 [.00, .06].

Table S2. Internalizing Behavior Moderated Mediation Model

| Effects for Internalizing Behavior (IB)        |       |      |       |            |
|------------------------------------------------|-------|------|-------|------------|
| Intercept Factor                               | EST   | SE   | STD   | <i>p</i> < |
| <b>Intercept Factor</b>                        |       |      |       |            |
| Mean                                           | 0.63  | 0.06 | 1.03  | .01        |
| Variance                                       | 0.33  | 0.03 | 0.89  | .01        |
| Covariance with Slope Factor                   | -0.02 | 0.03 | -0.10 | .40        |
| <b>Direct Effects</b>                          |       |      |       |            |
| Impulsiveness (IMP)                            | 0.17  | 0.03 | 0.27  | .01        |
| Sensation Seeking (SS)                         | -0.12 | 0.05 | -0.20 | .02        |
| IMP x SS                                       | 0.10  | 0.04 | 0.23  | .01        |
| Gender (Girl = 0, Boy = 1)                     | -0.18 | 0.07 | -0.15 | .01        |
| <b>Effects for Internalizing Behavior (IB)</b> |       |      |       |            |
| Slope Factor                                   | EST   | SE   | STD   | <i>p</i> < |
| <b>Slope Factor</b>                            |       |      |       |            |
| Slope Factor Mean                              | 0.15  | 0.09 | 0.38  | .07        |
| Slope Factor Variance                          | 0.16  | 0.08 | 0.99  | .04        |
| <b>Direct Effects</b>                          |       |      |       |            |
| Impulsiveness (IMP)                            | -0.04 | 0.04 | -0.10 | .31        |
| Sensation Seeking (SS)                         | 0.04  | 0.05 | 0.10  | .45        |
| IMP x SS                                       | -0.02 | 0.04 | -0.06 | .65        |
| Gender (Girl = 0, Boy = 1)                     | -0.03 | 0.08 | -0.03 | .75        |
| <b>Effects for Marijuana Use Frequency</b>     |       |      |       |            |
|                                                | EST   | SE   | STD   | <i>p</i> < |
| Impulsiveness (IMP)                            | 0.18  | 0.21 | 0.08  | .38        |
| Sensation Seeking (SS)                         | 1.42  | 0.42 | 0.63  | .01        |
| IMP x SS                                       | -0.53 | 0.24 | -0.33 | .03        |
| IB Intercept Factor                            | 1.09  | 0.34 | 0.30  | .01        |
| IB Slope Factor                                | 0.57  | 0.57 | 0.10  | .31        |
| Gender (Girl = 0, Boy = 1)                     | 0.33  | 0.37 | 0.07  | .38        |

*Note.* EST = unstandardized estimate; SE = standard error; STD =

standardized estimate. Impulsiveness was centered at one SD above the mean and sensation seeking was centered at the mean.

The indirect effect from sensation seeking to marijuana use through the IB intercept factor was significant,  $\beta = 0.02$  [0.01, 0.05]. The model had excellent overall fit (indices obtained via WLSMV estimation):  $\chi^2 = 33.31$ ,  $df = 24$ ,  $p = .10$ ; CFI = .99; RMSEA [90% CI] = .03 [.00, .06].
